# Supplementary material for: Characteristics of Gorilla-Specific Lactobacillus Isolated from Captive and Wild Gorillas
Source: MDPI journal article supplement (doi:10.3390/microorganisms6030086), 2018-08-14
Supplement: s2 [file s2]

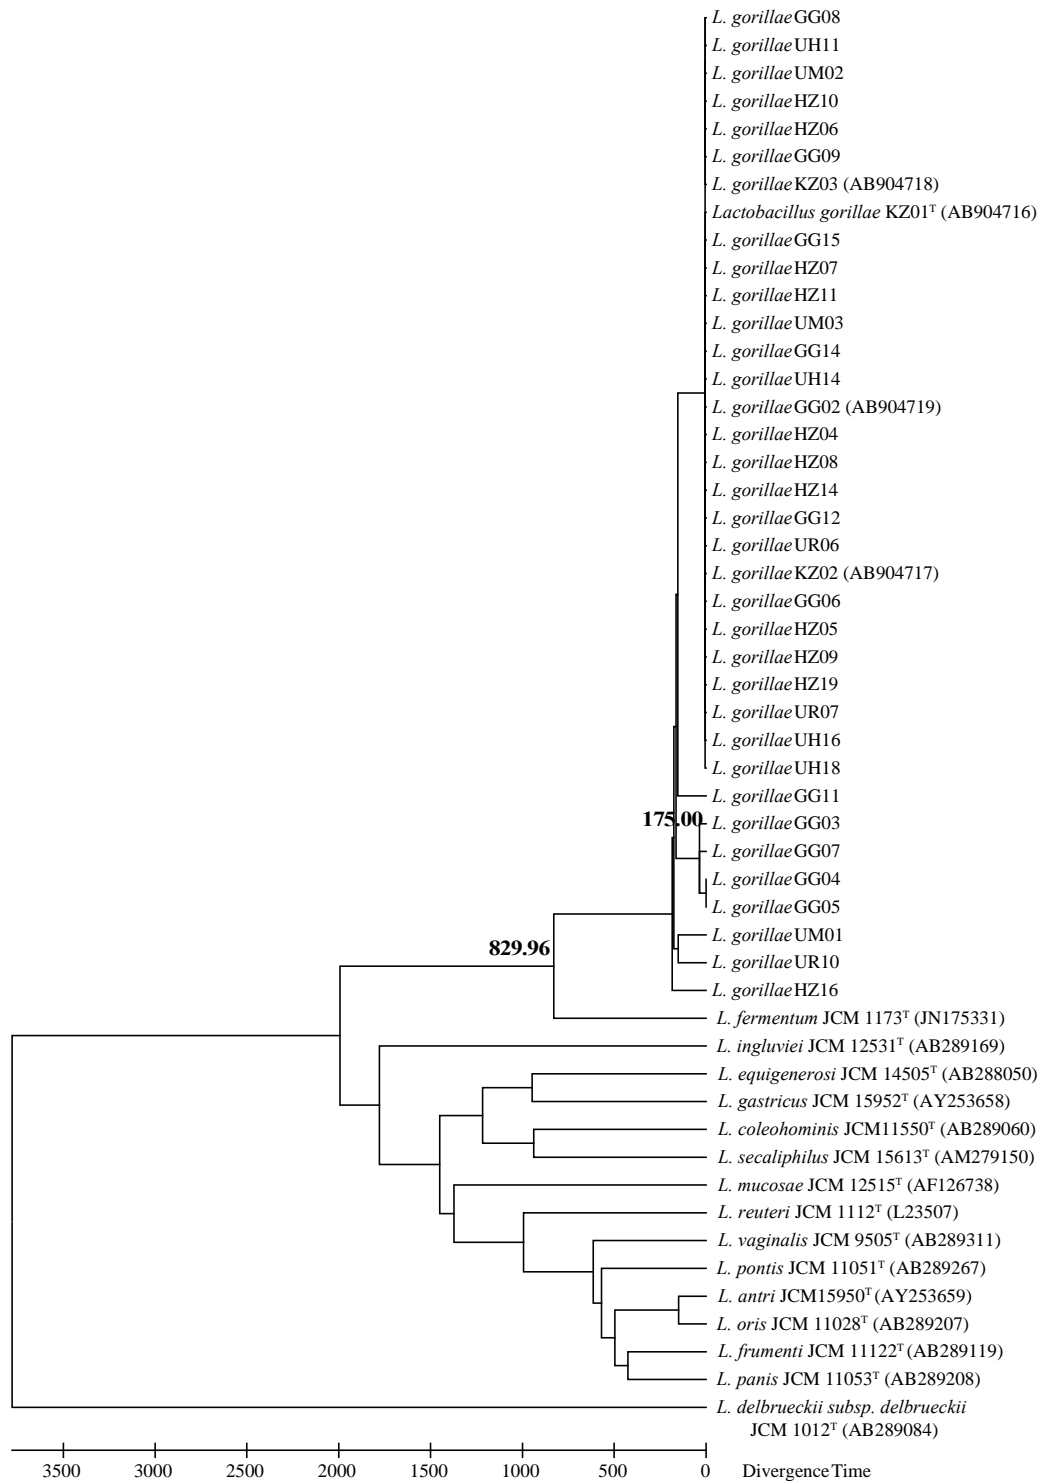

**Figure S1.** Phylogenetic analysis using 16S rRNA gene by Neighbor-joining method (time-tree). The time-tree shown was generated using the RelTime method [24]. Divergence times for all branching points in the topology were calculated by the Neighbor-joining methods. Evolutionary analysis were conducted in MEGA version 7.0.20 [24].
